# Supplementary material
Source: PubMed Central journal article supplement (PMC3156340)

# Supplemental Figure 1

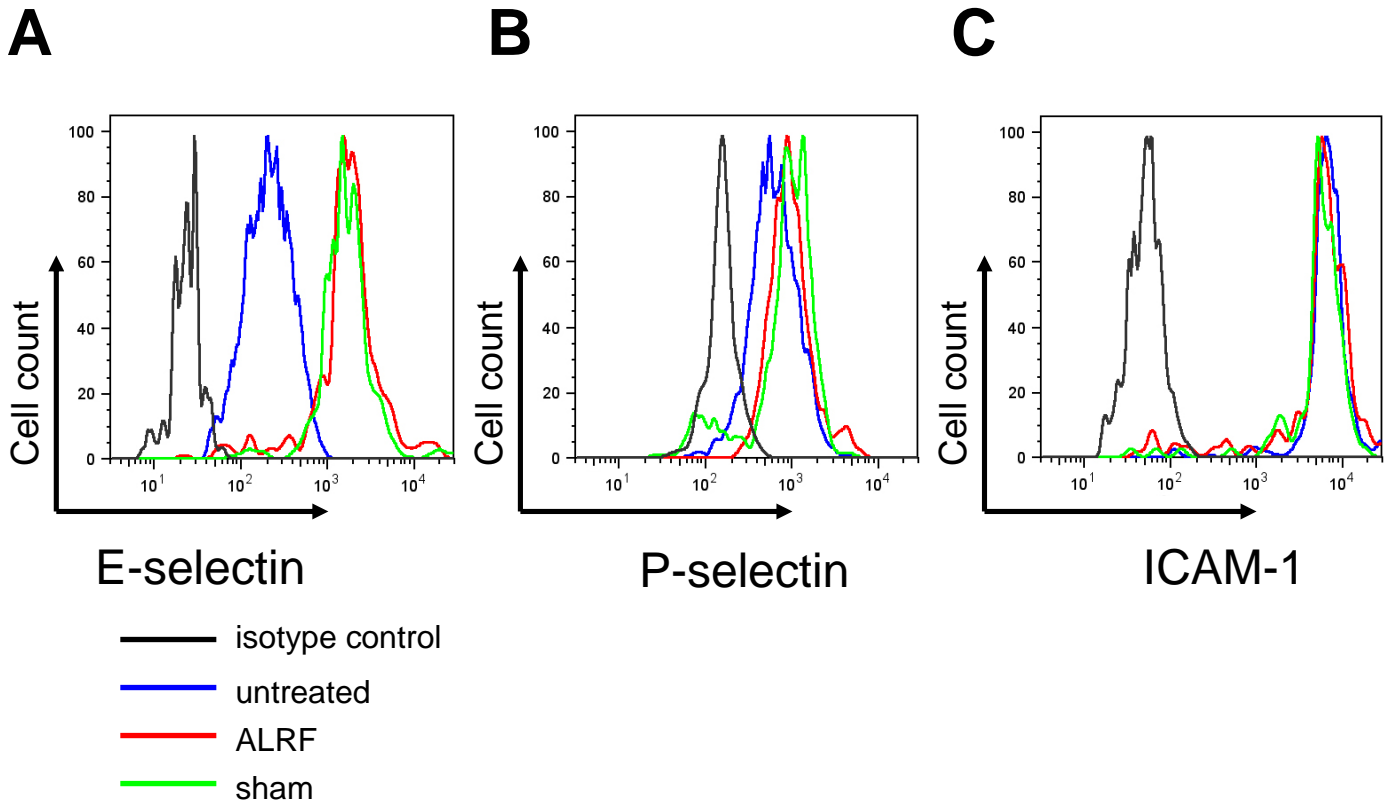

# Supplemental Figure 2

## A

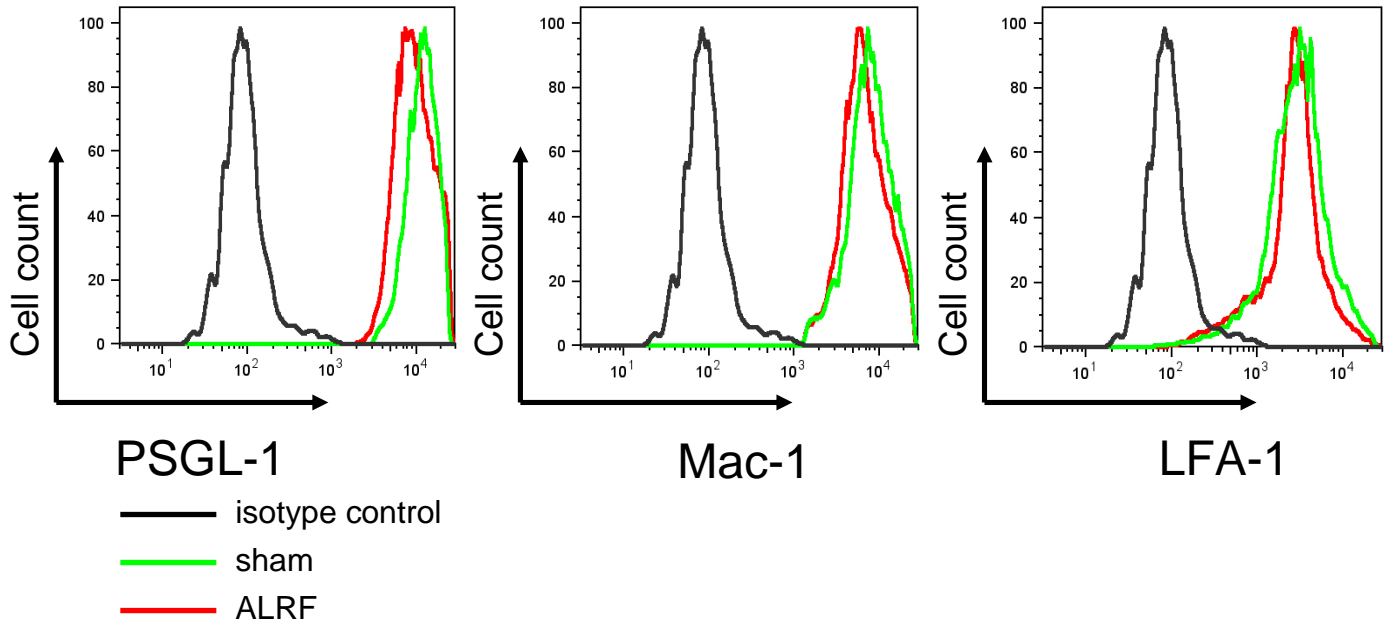

## B

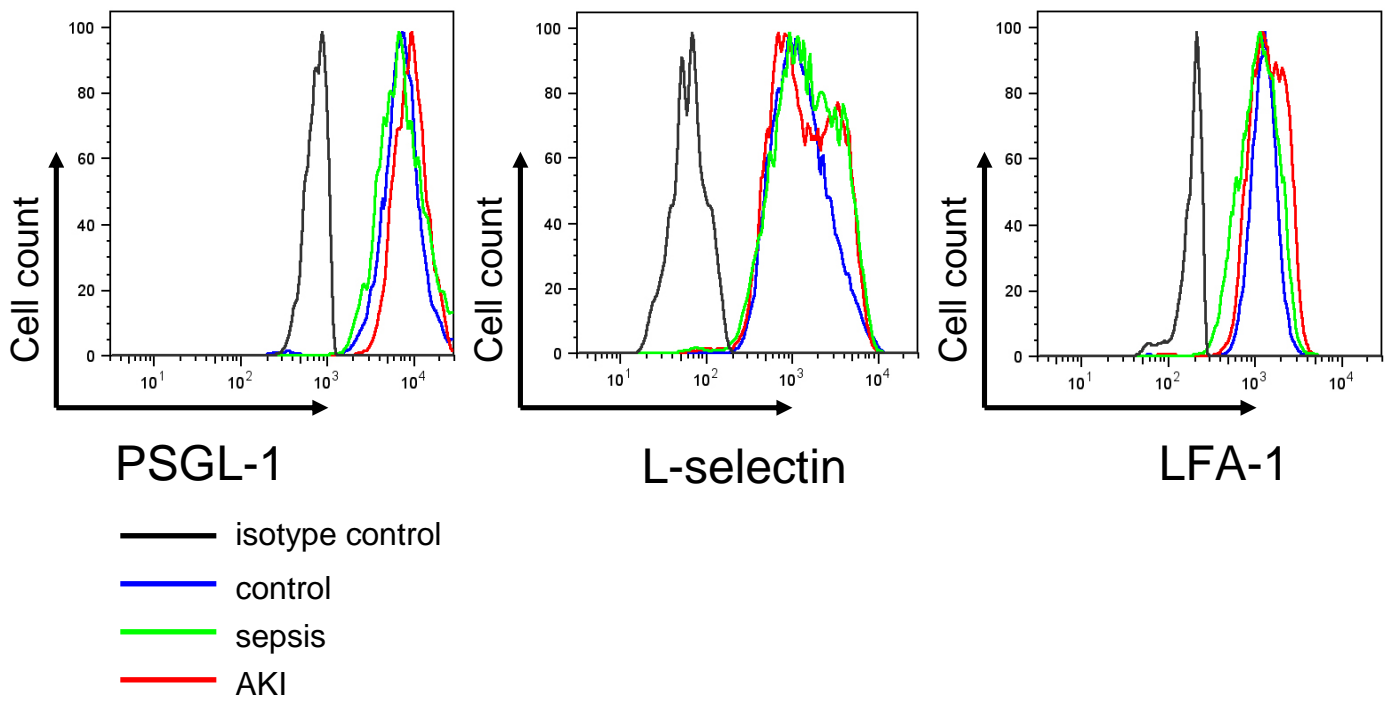

# Supplemental Figure 3

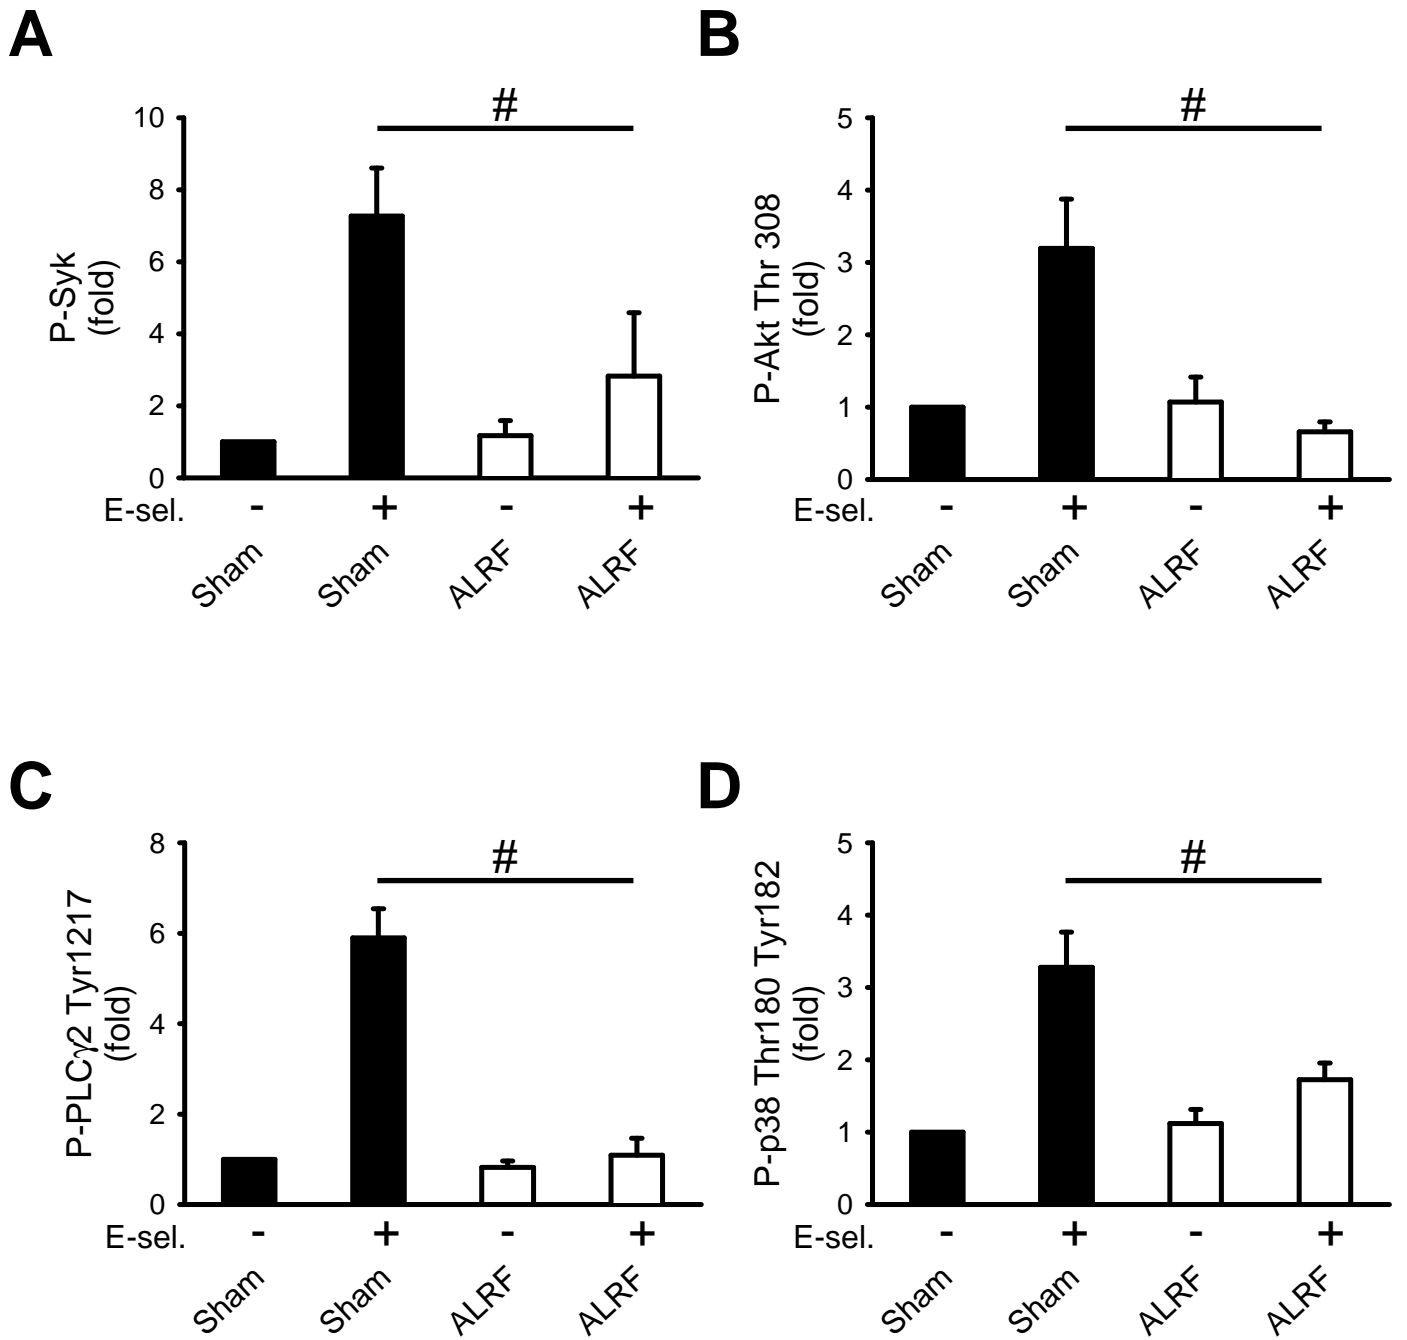

Supplement: NIHMS298165-supplement-Suppl__Fig_.pdf [file NIHMS298165-supplement-Suppl__Fig_.pdf]
